# Supplementary material
Source: publisher figshare collection journal article supplement (https://acs.figshare.com/ndownloader/files/34382742)
Supplement: Supplementary file [file 34382742]

## Supporting Information

# **Solvent and Flow Rate Effects on the Observed Compositional Profiles and the Relative Intensities of Radical and Protonated Species in Atmospheric Pressure Photoionization Mass Spectrometry**

Mary J. Thomas<sup>1,2</sup>, Ho Yi Holly Chan<sup>2</sup>, Diana Catalina Palacio Lozano<sup>2</sup>, Mark P. Barrow<sup>2\*</sup>

1. Molecular Analytical Sciences Centre for Doctoral Training, University of Warwick, Coventry, CV4 7AL
2. Department of Chemistry, University of Warwick, Coventry, CV4 7AL

\*Corresponding Author [M.P.Barrow@warwick.ac.uk](mailto:M.P.Barrow@warwick.ac.uk)

## Table of Contents

**Table S1.** Properties of solvents used, with cosolvents used in the first and second stages of the study ordered by polarity index

**Table S2.** Design of Experiment Parameters. 3 factors (sample concentration, toluene fraction, and flow rate) were studied using a full factorial  $2^3$  design, using a single replicate of 13 runs including 5 centrepoints. All terms were free from aliasing

**Table S3.** Composer 1.5.7 parameters for the assignment of molecular formulae

**Figure S1.** Summed relative intensity of protonated and radical ion classes assigned in solvent systems initially studied

**Figure S2.** Summed relative intensity of protonated and radical ion classes containing at least one sulfur atom assigned in solvent systems initially studied

**Figure S3.** Hypothetical scheme illustrating ethyl acetate generating sources of labile protons; its resonance stabilized protonated form, and its hydrolysis product acetic acid.  $[H]^+$  may be generated in the source as indicated in Equation scheme 1

**Figure S4.** DBE vs. carbon number plots for N and N[H] classes in toluene:propan-2-ol and toluene:ethyl acetate solvent systems, with squares surrounding corresponding DBE and carbon number values demonstrating the similarity between the species apparent in the N class and N[H] class of each, respectively. The N[H] class was observed at low relative intensity in the toluene:propan-2-ol solvent system, while the N class was not detected in the toluene:ethyl acetate solvent system

**Figure S5.** DBE vs. carbon number plots for S and S[H] classes in toluene:propan-2-ol and toluene:ethyl acetate solvent systems, demonstrating similarity between the species apparent in the S class and S[H] class of each, respectively. The S[H] class and S class were observed at low relative intensity in the toluene:propan-2-ol and toluene:ethyl acetate solvent systems respectively

**Figure S6.** Summed N and N[H] class DBE distribution for the toluene:propan-2-ol solvent system compared the N[H] class DBE distribution for the toluene:ethyl acetate solvent system

**Figure S7.** Summed S and S[H] class DBE distribution for the toluene:propan-2-ol solvent system compared the S[H] class DBE distribution for the toluene:ethyl acetate solvent system

**Figure S8.** DBE distribution of the N[H] class compared between the toluene:ethyl acetate and toluene:propan-2-ol solvent systems

**Figure S9.** Normalized relative intensities of S and S[H] classes for all solvent systems studied

**Figure S10.** Change in S/S[H] with total vapour pressure of solvent system

**Figure S11.** Change in S/S[H] with polarity index of solvent added at 20 v/v % to solvent system

**Figure S12.** Change in  $S/S[H]$  with ionization energy of solvent added at 20 v/v % to solvent system

**Table S4.** Molecular entities with proton affinities between 157.8 and 628 kJmol<sup>-1</sup>. Due to the hazards associated with these, or their lack of stability and commercial availability, in liquid form, they are unsuitable to be used as cosolvents used in this study.

**Figure S13.** Summary of DoE study where response factor is the mean ratio of radical to protonated species (R/P). While higher sample concentration and larger toluene solvent fraction increase radical ion formation, a high flow rate decreases the relative proportion of radical species detected. Red squares are indicative of the effect at the centerpoint of the DoE.

**Figure S14.** Pareto chart of standardized effects for DoE experiments. The response is the mean ratio of radical and protonated species detected (R/P). Factors that exceed the dashed reference line are statistically significant at the  $\alpha = 0.05$  level.

**Figure S15.** Percent change in monoisotopic absolute intensity of model compound spiked into Iraqi crude oil dissolved in different solvent systems with flow rate relative to observed intensity at 1000  $\mu\text{L h}^{-1}$ .

**Table S1.** Properties of solvents used, with cosolvents used in the first and second stages of the study ordered by polarity index

| Solvent       | Polarity Index | pKa  | Ionization Energy / eV | Vapor Pressure / $\text{kJ mol}^{-1}$ | Boiling Point / K | Proton Affinity / $\text{kJ mol}^{-1}$ |
|---------------|----------------|------|------------------------|---------------------------------------|-------------------|----------------------------------------|
| Toluene       | 2.3            | 41   | $8.828 \pm 0.001$      | $37 \pm 3$                            | $383.8 \pm 0.2$   | 784.0                                  |
| n-hexane      | 0.0            | N/A  | $10.13 \pm 0.10$       | $31 \pm 1$                            | $341.9 \pm 0.3$   | 672.5                                  |
| DCM           | 3.4            | N/A  | $11.33 \pm 0.04$       | $29.03 \pm 0.08$                      | $313 \pm 1$       | 628.0                                  |
| Propan-2-ol   | 4.3            | 17.1 | $10.17 \pm 0.02$       | $45 \pm 3$                            | $355.5 \pm 0.4$   | 793.0                                  |
| Ethyl acetate | 4.3            | 25   | $10.01 \pm 0.05$       | $35 \pm 2$                            | $350.2 \pm 0.2$   | 835.7                                  |
| Chloroform    | 4.4            | 15.5 | $11.37 \pm 0.02$       | $31.32 \pm 0.08$                      | $334.3 \pm 0.2$   | 157.8 <sup>†</sup>                     |
| Acetonitrile  | 6.2            | 25   | $12.20 \pm 0.01$       | $33.45 \pm 0.21$                      | $354.8 \pm 0.4$   | 779.2                                  |
| Acetone       | 5.1            | 19.6 | $9.703 \pm 0.006$      | 31.27                                 | $329.3 \pm 0.3$   | 812                                    |
| Ethanol       | 5.2            | 16   | $10.48 \pm 0.07$       | $42.3 \pm 0.4$                        | $351.5 \pm 0.2$   | 776.4                                  |
| Acetic Acid   | 6.2            | 4.75 | $10.65 \pm 0.02$       | $51.6 \pm 1.5$                        | $391.2 \pm 0.6$   | 783.7                                  |

<sup>†</sup>Calculated value.

**Table S2.** Design of Experiment Parameters. 3 factors (sample concentration, toluene fraction, and flow rate) were studied using a full factorial  $2^3$  design, using a single replicate of 13 runs including 5 centrepoints. All terms were free from aliasing

| Standard Order | Run Order | Centrepoint? | Blocks | Concentration /<br>mg mL <sup>-1</sup> | Toluene Fraction / % | Flow Rate /<br>μL h <sup>-1</sup> |
|----------------|-----------|--------------|--------|----------------------------------------|----------------------|-----------------------------------|
| 2              | 1         | No           | 1      | 0.300                                  | 20                   | 600                               |
| 4              | 2         | No           | 1      | 0.300                                  | 100                  | 600                               |
| 10             | 3         | Yes          | 1      | 0.175                                  | 60                   | 2300                              |
| 6              | 4         | No           | 1      | 0.300                                  | 20                   | 4000                              |
| 3              | 5         | No           | 1      | 0.050                                  | 100                  | 600                               |
| 11             | 6         | Yes          | 1      | 0.175                                  | 60                   | 2300                              |
| 9              | 7         | Yes          | 1      | 0.175                                  | 60                   | 2300                              |
| 8              | 8         | No           | 1      | 0.300                                  | 100                  | 4000                              |
| 13             | 9         | Yes          | 1      | 0.175                                  | 60                   | 2300                              |
| 7              | 10        | No           | 1      | 0.050                                  | 100                  | 4000                              |
| 12             | 11        | Yes          | 1      | 0.175                                  | 60                   | 2300                              |
| 1              | 12        | No           | 1      | 0.050                                  | 20                   | 600                               |
| 5              | 13        | No           | 1      | 0.050                                  | 20                   | 4000                              |

**Table S3.** Composer 1.5.7 parameters for the assignment of molecular formulae

| Parameter      | Constraints                                                                  |
|----------------|------------------------------------------------------------------------------|
| Polarity       | Positive                                                                     |
| Ion properties | Adducts = H; allow radical and adduct/loss ions; remove isolated assignments |
| m/z range      | m/z 200-1300                                                                 |
| DBE range      | -0.5 - 40                                                                    |
| Element ranges | C = 0-200; H = 0-1000 ; N= 0-4; O = 0-4; S = 0-6                             |

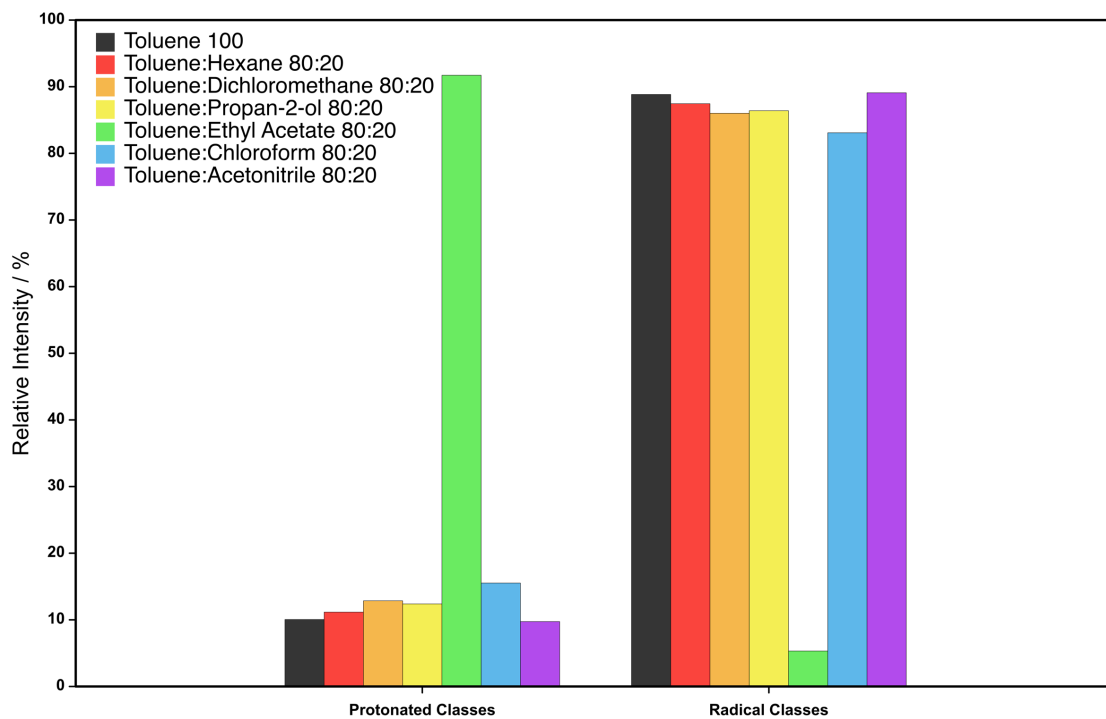

**Figure S1.** Summed relative intensity of protonated and radical ion classes assigned in solvent systems initially studied

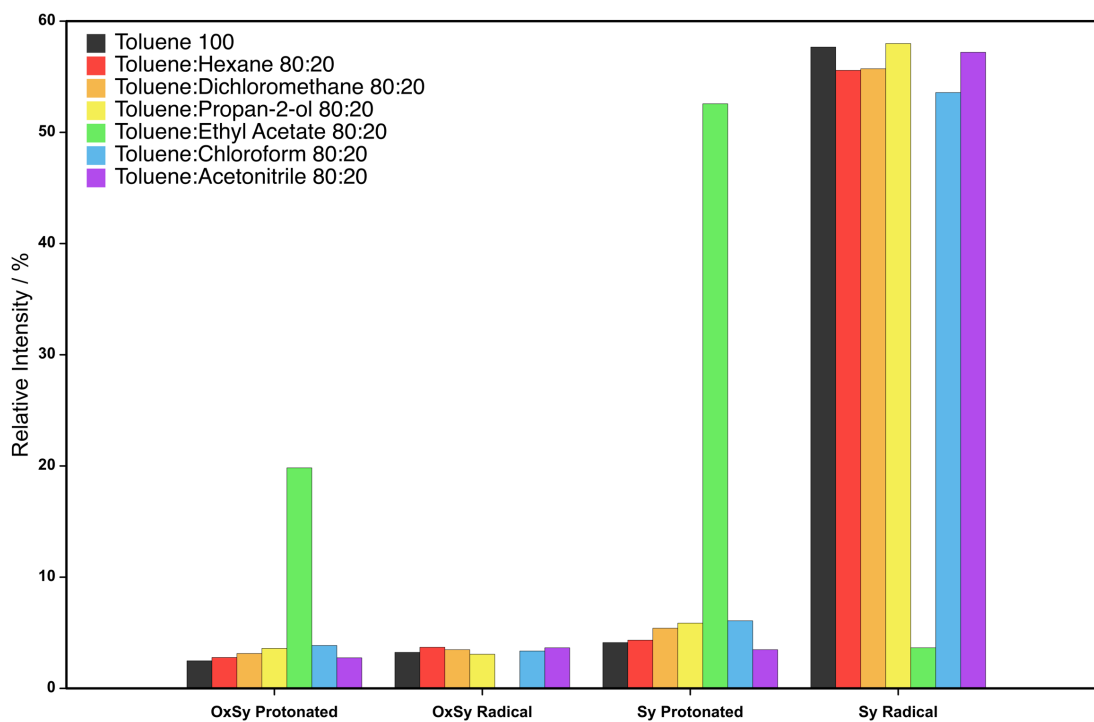

**Figure S2.** Summed relative intensity of protonated and radical ion classes containing at least one sulfur atom assigned in solvent systems initially studied

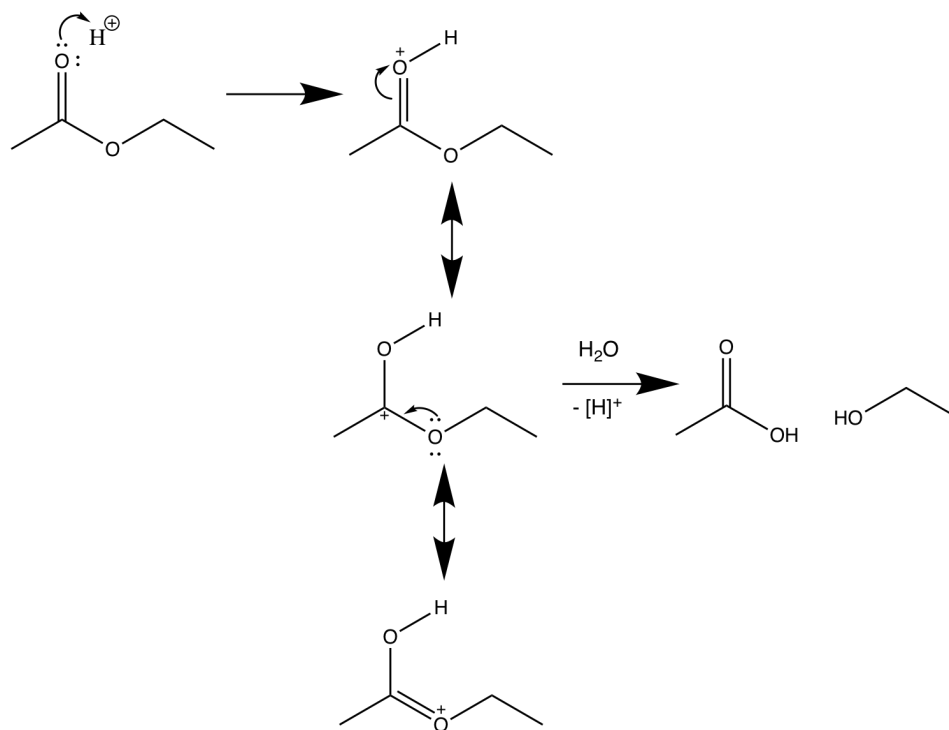

**Figure S3.** Hypothetical scheme illustrating ethyl acetate generating sources of labile protons; its resonance stabilized protonated form, and its hydrolysis product acetic acid.  $[\text{H}]^+$  may be generated in the source as indicated in Equation scheme 1

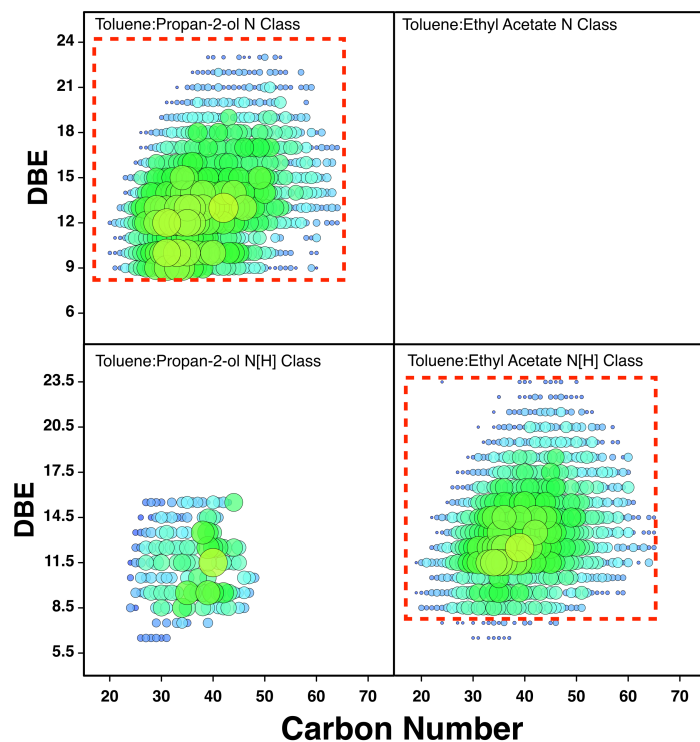

**Figure S4.** DBE vs. carbon number plots for N and N[H] classes in toluene:propan-2-ol and toluene:ethyl acetate solvent systems, with squares surrounding corresponding DBE and carbon number values demonstrating the similarity between the species apparent in the N class and N[H] class of each, respectively. The N[H] class was observed at low relative intensity in the toluene:propan-2-ol solvent system, while the N class was not detected in the toluene:ethyl acetate solvent system



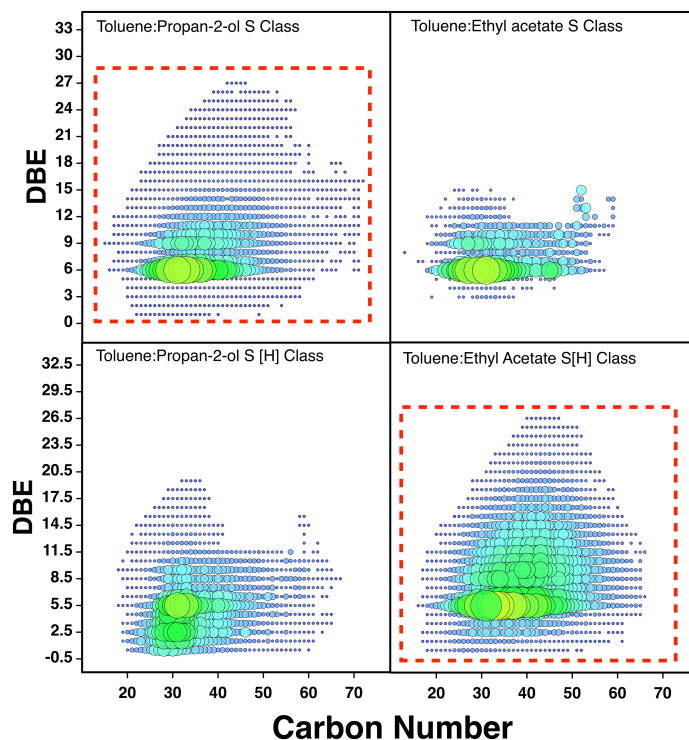

**Figure S5.** DBE vs. carbon number plots for S and S[H] classes in toluene:propan-2-ol and toluene:ethyl acetate solvent systems, demonstrating similarity between the species apparent in the S class and S[H] class of each, respectively. The S[H] class and S class were observed at low relative intensity in the toluene:propan-2-ol and toluene:ethyl acetate solvent systems respectively

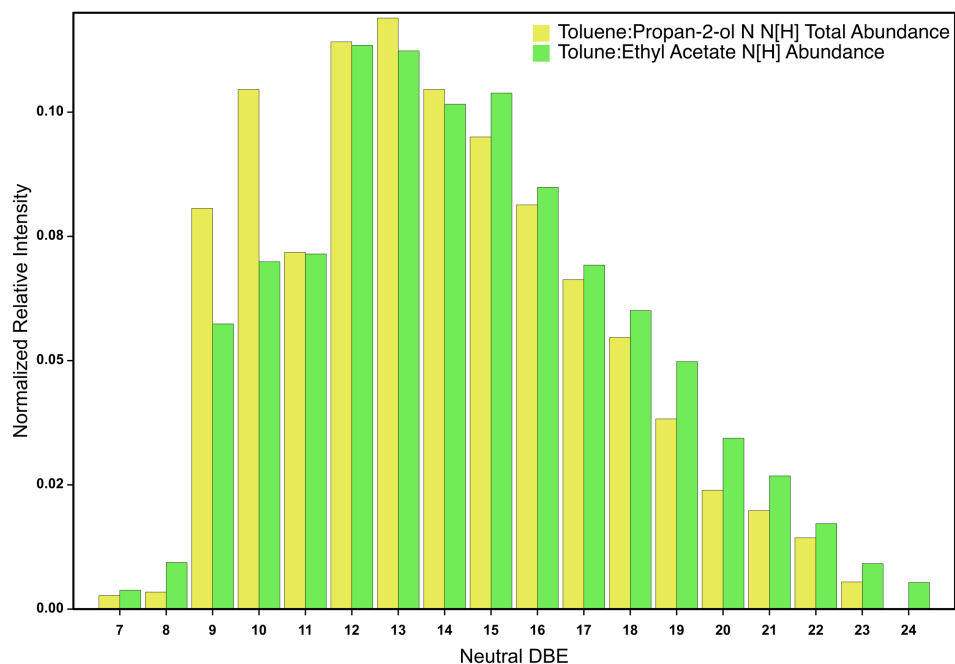

**Figure S6.** Summed N and N[H] class DBE distribution for the toluene:propan-2-ol solvent system compared the N[H] class DBE distribution for the toluene:ethyl acetate solvent system

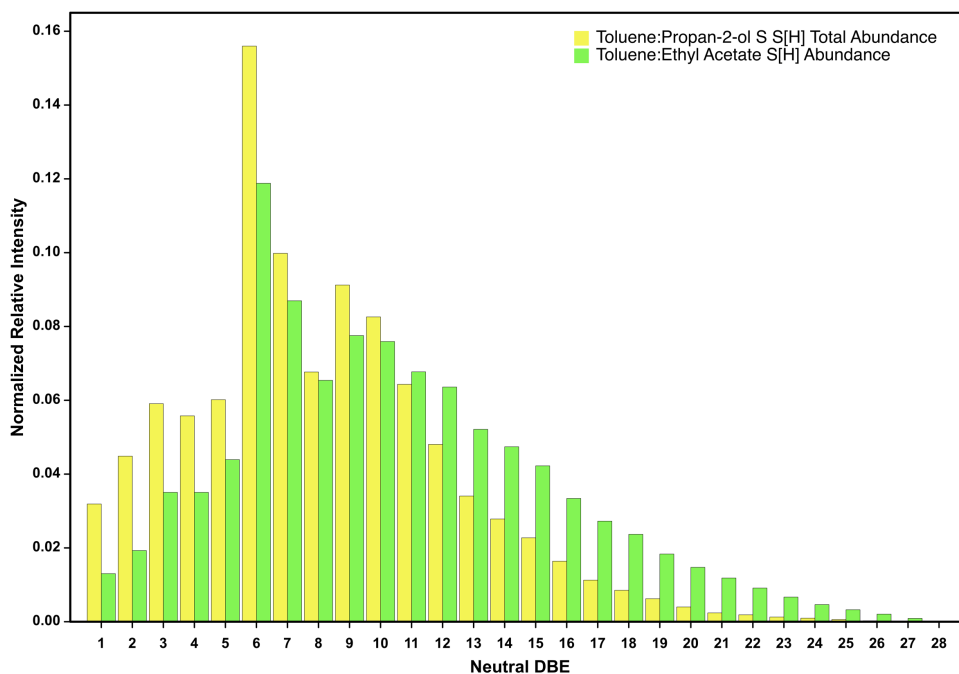

**Figure S7.** Summed S and S[H] class DBE distribution for the toluene:propan-2-ol solvent system compared the S[H] class DBE distribution for the toluene:ethyl acetate solvent system

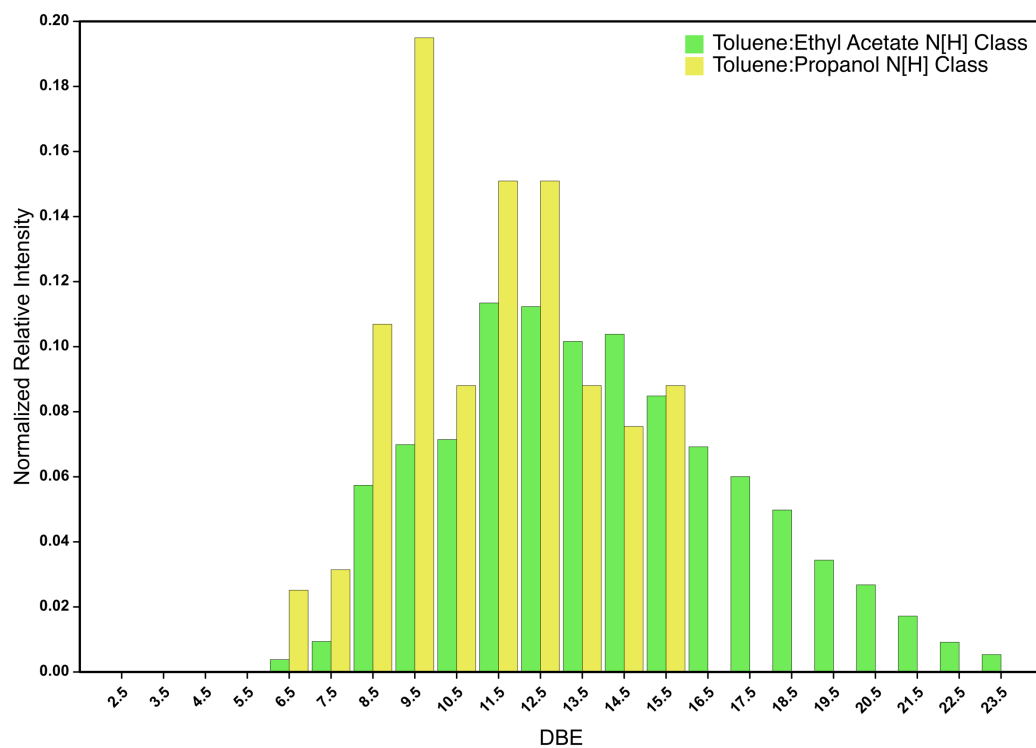

**Figure S8.** DBE distribution of the N[H] class compared between the toluene:ethyl acetate and toluene:propan-2-ol solvent systems

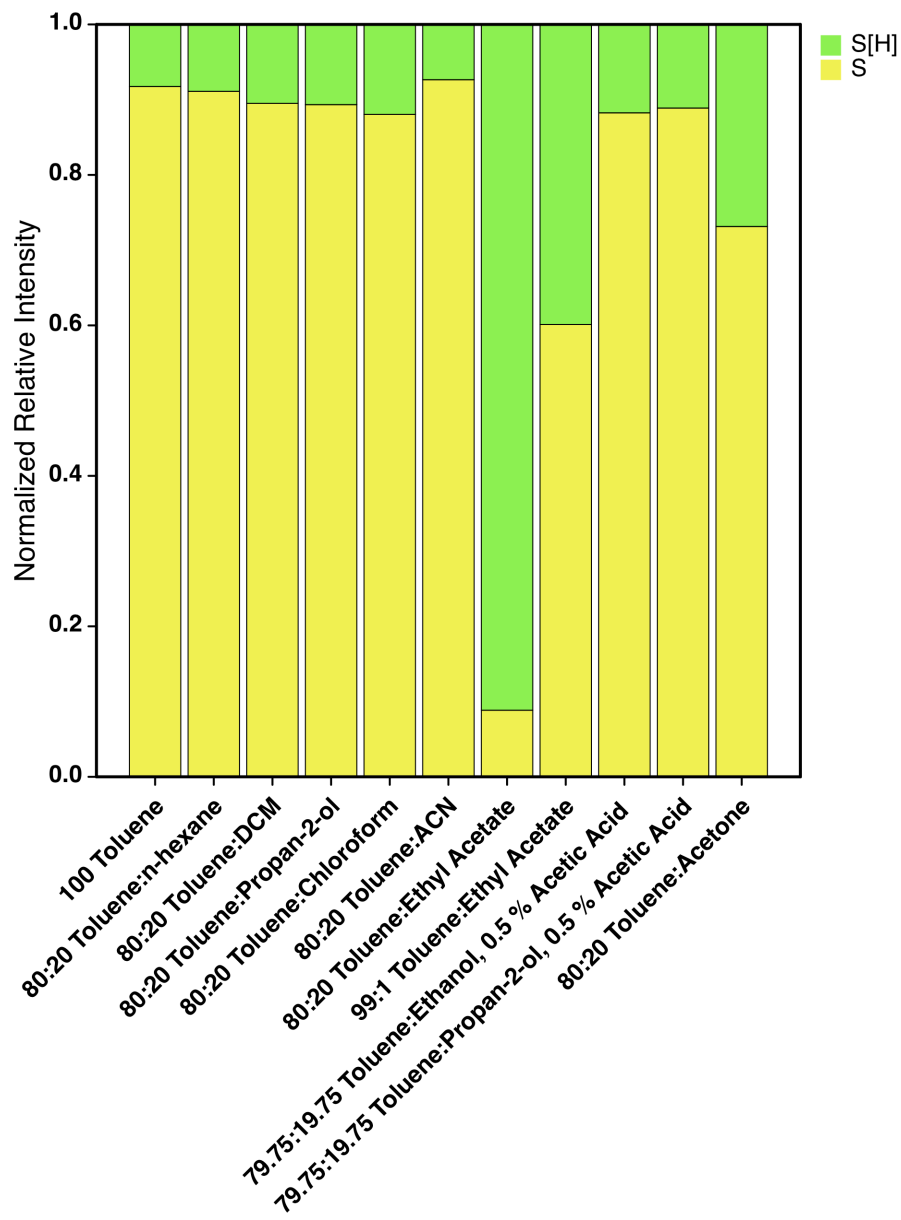

**Figure S9.** Normalized relative intensities of S and S[H] classes for all solvent systems studied

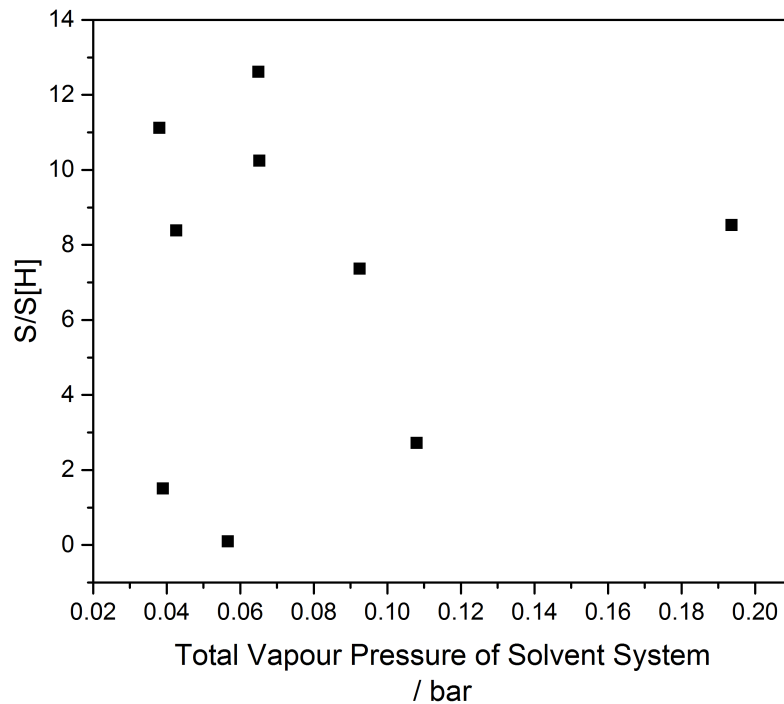

**Figure S10.** Change in S/S[H] with total vapour pressure of solvent system

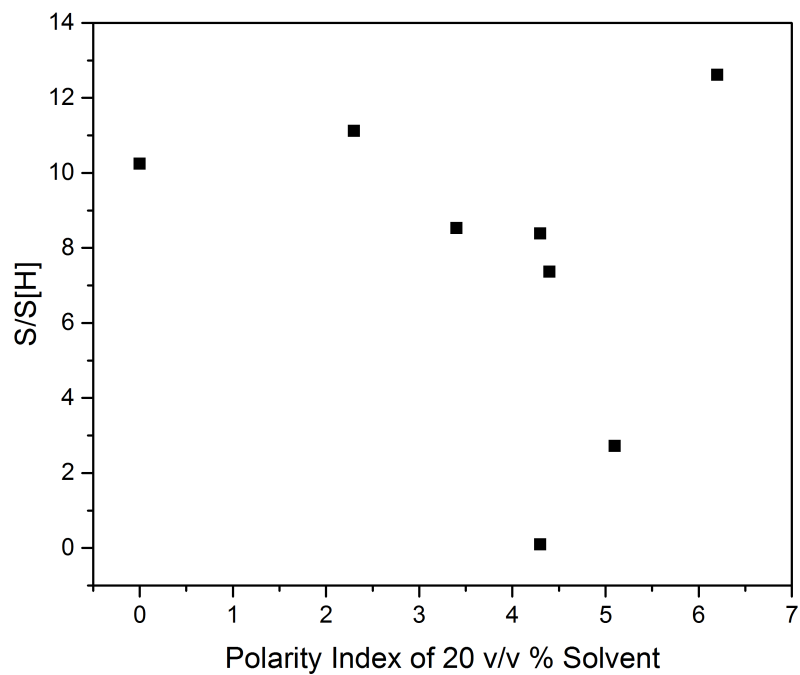

**Figure S11.** Change in S/S[H] with polarity index of solvent added at 20 v/v % to solvent system

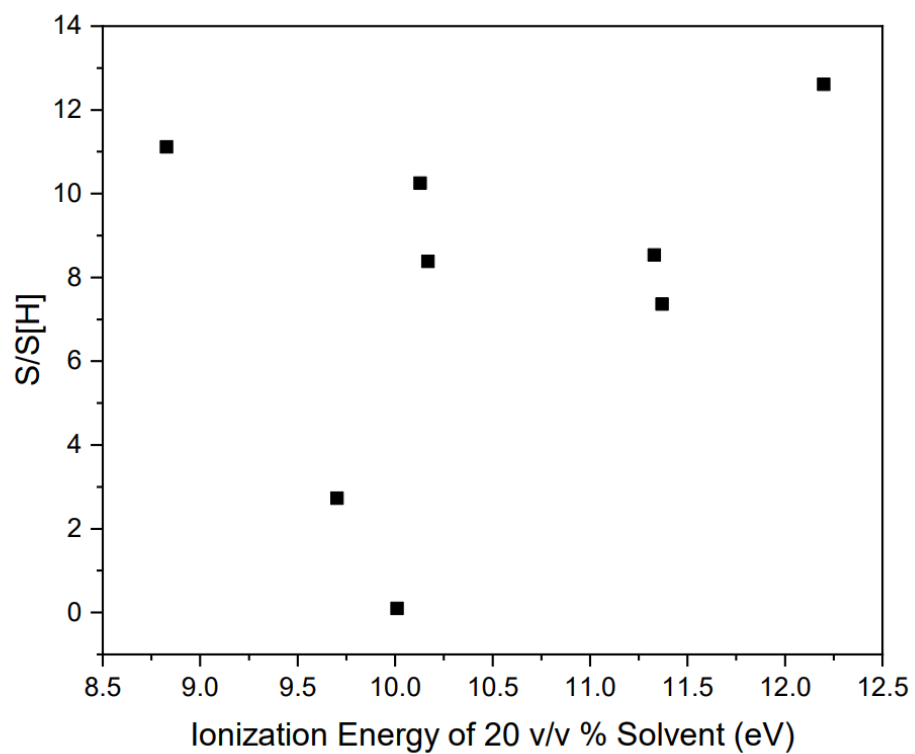

**Figure S12.** Change in  $S/S[H]$  with ionization energy of solvent added at 20 v/v % to solvent system

**Table S4.** Molecular entities with proton affinities between 157.8 and 628 kJmol<sup>-1</sup>. Due to the hazards associated with these, or their lack of stability and commercial availability, in liquid form, they are unsuitable to be used as cosolvents used in this study.

| Molecular entity       | Proton Affinity<br>/ kJ mol <sup>-1</sup> |
|------------------------|-------------------------------------------|
| Helium                 | 177.8                                     |
| Argon                  | 369.2                                     |
| Hydrogen fluoride      | 484.0                                     |
| Nitric oxide           | 531.8                                     |
| Carbon dioxide         | 540.5                                     |
| Methane                | 543.5                                     |
| Hydrogen chloride      | 556.9                                     |
| Chlorotrifluoromethane | 571.3                                     |
| Ethane                 | 596.3                                     |

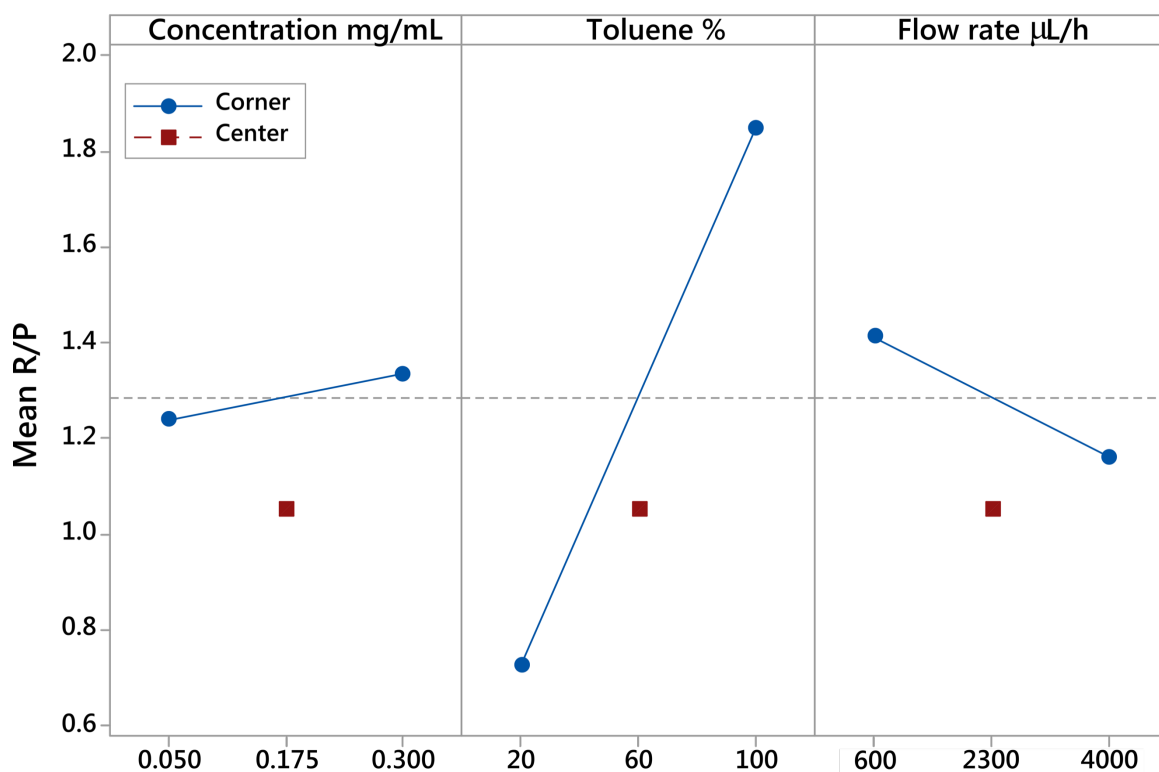

**Figure S13.** Summary of DoE study where response factor is the mean ratio of radical to protonated species (R/P). While higher sample concentration and larger toluene solvent fraction increase radical ion formation, a high flow rate decreases the relative proportion of radical species detected. Red squares are indicative of the effect at the centerpoint of the DoE.



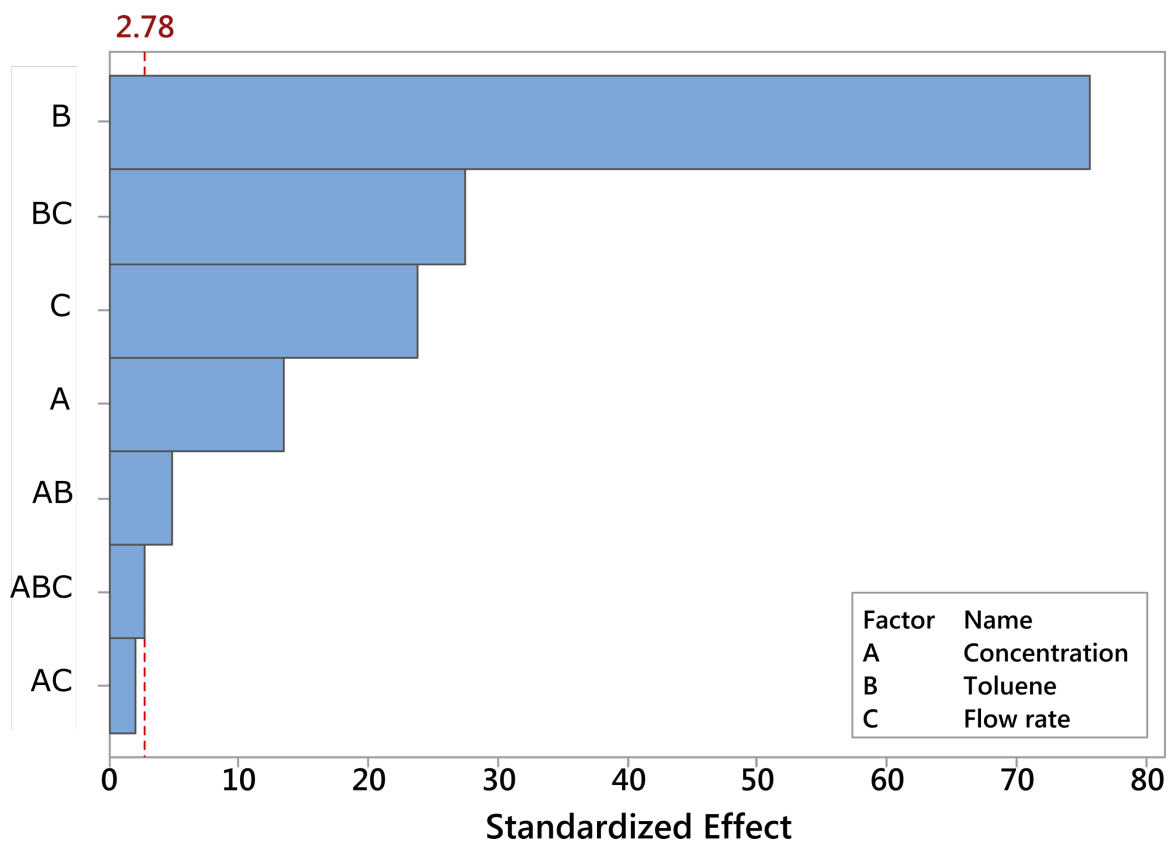

**Figure S14.** Pareto chart of standardized effects for DoE experiments. The response is the mean ratio of radical and protonated species detected (R/P). Factors that exceed the dashed reference line are statistically significant at the  $\alpha = 0.05$  level.

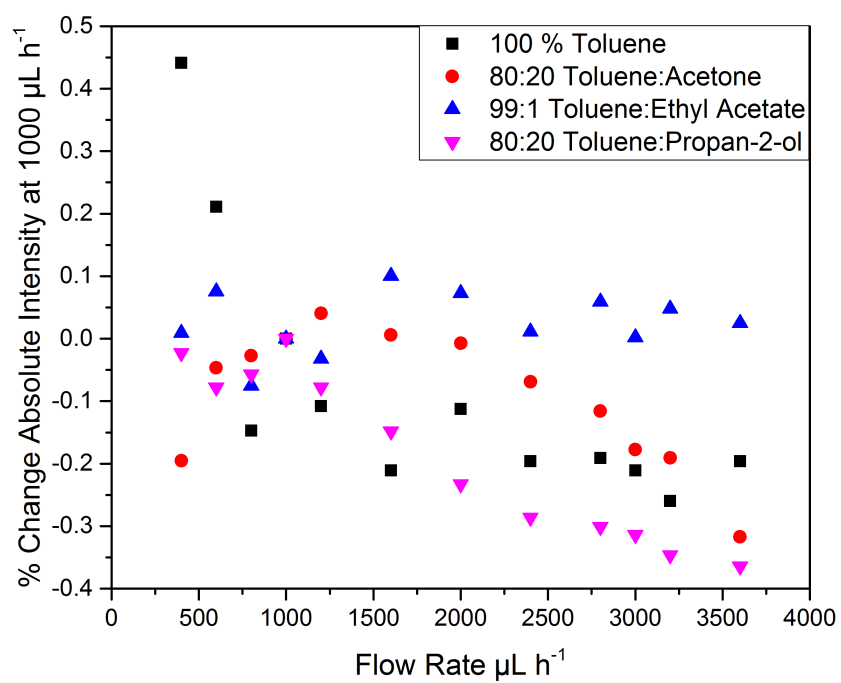

**Figure S15.** Percent change in monoisotopic absolute intensity of model compound spiked into Iraqi crude oil dissolved in different solvent systems with flow rate relative to observed intensity at 1000  $\mu\text{L h}^{-1}$ .
